# Supplementary material for: Running in highly cushioned shoes increases leg stiffness and amplifies impact loading
Source: PubMed Central journal article supplement (PMC6269547; doi:10.1038/s41598-018-35980-6), 2018-11-30
Supplement: 41598_2018_35980_MOESM1_ESM.pdf [file 41598_2018_35980_MOESM1_ESM.pdf]

Supplementary Materials for

## **Running in highly cushioned shoes increases leg stiffness and amplifies impact loading**

Juha-Pekka Kulmala<sup>1,2</sup>, Jukka Kosonen<sup>3</sup>, Jussi Nurminen<sup>1</sup>, Janne Avela<sup>3</sup>

<sup>1</sup> Motion Analysis Laboratory, Children's Hospital, University of Helsinki and Helsinki University Hospital, Helsinki, Finland.

<sup>2</sup> John A. Paulson School of Engineering and Applied Sciences, Harvard University, Cambridge, MA, USA.

<sup>3</sup> Neuromuscular Research Center, Biology and Physical Activity, Faculty of Sport and Health Sciences, University of Jyväskylä, Jyväskylä, Finland.

Corresponding author:

Dr. Juha-Pekka Kulmala  
juha-pekka.kulmala@gmail.com

### **The PDF file includes:**

- Figure S1. Mean data of the body's CoM (Centre of Mass) height **a** and displacement **b** trajectories for the CON and MAX shoes at slow and fast running speeds.
- Table S2. Dimensionless leg stiffness and leg compression data for the CON and MAX shoes at slow and fast running speeds.

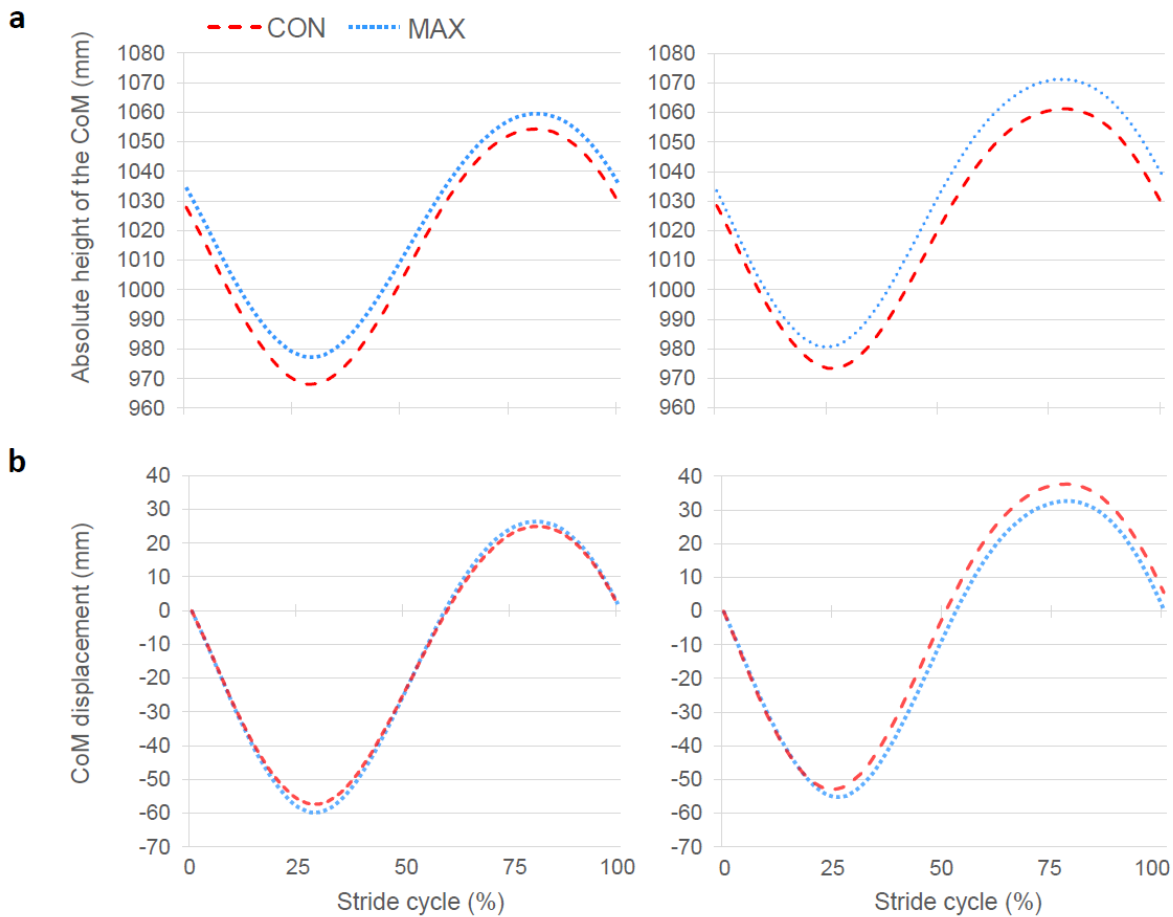

**Figure S1.** Mean data of the body's CoM (Centre of Mass) height **a** and displacement **b** trajectories for the CON and MAX shoes at slow and fast running speeds.

**Table S1.** Dimensionless leg stiffness and leg compression data for the CON and MAX shoes at slow and fast running speeds.

|                                             | Slow speed (10 km/h) |               |                | Fast speed (14.5 km/h) |               |                |
|---------------------------------------------|----------------------|---------------|----------------|------------------------|---------------|----------------|
|                                             | CON shoe             | MAX shoe      | <i>t</i> -test | CON shoe               | MAX shoe      | <i>t</i> -test |
| <i>Spring-like mechanics</i>                |                      |               |                |                        |               |                |
| Dimensionless leg stiffness <sup>++</sup>   | 26.0 (5.6)           | 26.7 (6.2)    | 0.208          | 28.5 (6.5)             | 30.1 (7.0)    | 0.006**        |
| Dimensionless leg compression <sup>++</sup> | 0.100 (0.014)        | 0.096 (0.014) | 0.029*         | 0.101 (0.015)          | 0.097 (0.016) | 0.007**        |

Univariate difference between shoe conditions (*t*-test): \* $p < 0.05$  and \*\* $p < 0.01$ .

The main effect for shoe conditions (a two-way repeated measures ANOVA): <sup>++</sup> $p < 0.01$

Dimensionless leg stiffness was calculated by normalising leg stiffness (in kN/m) by body weight and leg length.

Dimensionless leg compression was calculated by normalising leg compression by leg length.
